# Supplementary material for: Versatile trifunctional chemosensor of rhodamine derivative for Zn2+, Cu2+ and His/Cys in aqueous solution and living cells
Source: Royal Society of Chemistry journal article supplement (doi:10.1039/c1ob06025b), 2011-01-01
Supplement: c1ob06025b.pdf [file c1ob06025b.pdf]

Supplementary Material (ESI) for Organic and Biomolecular Chemistry  
This journal is (c) The Royal Society of Chemistry 2011

## Supporting Information for

### **Versatile trifunctional chemosensor of rhodamine derivative for $\text{Zn}^{2+}$ , $\text{Cu}^{2+}$ and His/Cys in aqueous solution and living cell**

**Lin Xu, Yufang Xu, Weiping Zhu, Bubing Zeng, Chunmei Yang,  
Bin Wu and Xuhong Qian\***

Shanghai Key Laboratory of Chemical Biology, School of Pharmacy,  
East China University of Science and Technology, Shanghai, 200237, China.  
Fax: +86 21 6425 2603; Tel: +86 21 6425 3589; E-mail: xhqian@ecust.edu.cn

#### **Contents:**

- 1. Materials and Apparatus**
- 2. Synthesis of chemosensor RP**
- 3. The characterization data of chemosensor RP**
- 4. The pH-titration of free RP and  $[\text{RP}@\text{Zn}^{2+}]$**
- 5. The selective and competitive experiments**
- 6. Job's plot of RP and  $\text{Cu}^{2+}$ ,  $\text{Zn}^{2+}$**
- 7. ESI-MS of RP in the presence of  $\text{Cu}^{2+}$  or  $\text{Zn}^{2+}$**
- 8. Partial  $^1\text{H}$  NMR spectra of RP and  $\text{Zn}^{2+}$**
- 9. Partial  $^1\text{H}$  NMR spectra of RP and  $\text{Cu}^{2+}$**
- 10. Reference**

Supplementary Material (ESI) for Organic and Biomolecular Chemistry

This journal is (c) The Royal Society of Chemistry 2011

## 1. Materials and Apparatus

Unless otherwise mentioned, all the reagents were of analytic grade.  $^1\text{H}$ -NMR and  $^{13}\text{C}$ -NMR spectras were measured on a Bruker AM-400 spectrometer with chemical shifts reported as ppm (in  $\text{CDCl}_3$ , TMS as internal standard). Mass spectrometry were obtained with a HP 5989A spectrometer. All pH measurements were made with a Sartorius basic pH-Meter PB-20. Absorption spectra were determined on a Varian Cary 100 Spectrophotometer. Fluorescence spectra were determined on a Varian Cary Eclipse. HPLC strace was determined on a HP-1100 spectrometer. IR was obtained with a Nicolet-470 spectrometer.

## 2. Synthesis of chemosensor RP

**Rhodamine B hydrozide (1):** In this work, **1** was synthesized according to the reference<sup>1</sup>. To a 50 mL flask, rhodamine B (480 mg, 1.0 mmol) was dissolved in 12 mL ethanol. 1.2 mL (excess) hydrazine hydrate (85%) was then added. After the addition, the mixture was heated to reflux for 2 h. The solution changed from dark purple to light orange and became clear. Then the mixture was cooled and solvent was removed under redured pressure. 1 M HCl (about 20 mL) was added to the solid in the flask to generate a clear red solution. After that, 1 M NaOH (about 28 mL) was added slowly with stirring until the pH of the solution reached 9~10. The resulting precipatate was filtered and washed 3 times with 6 mL water, and then dired in air. The product was then chromatographed on silica gel using dichloromethane/methanol 30: 1 (v/v) as eluant to afford 365 mg (80%) **1** as pink solid.

**RP: 1** (0.21 mmol, 100 mg) was dissolved in 2 mL absolute methanol, di-2-pyridyl ketone (0.42 mmol, 78 mg) were added, and then 2 drops of acetic acid were added to the mixture. The mixture was heated to reflux and stirred for 3 h. After that, the solvent was removed in vacuum to give a purple solid. The crude product was then chromatographed on silica gel using dichloromethane/methanol 20: 1 (v/v) as eluant to afford 88 mg (65%) **RP** as purple solid. Mp: 125.2 °C. IR (KBr),  $\nu$ : 2965, 2354, 2327, 1704, 1615, 1502, 1454, 1430, 1301, 1218, 1116, 791, 745  $\text{cm}^{-1}$ .  $^1\text{H}$  NMR ( $\text{CDCl}_3$ , 400 MHz):  $\delta$  1.20 (t,  $J = 7.2$  Hz, 12H), 3.35-3.40 (m, 8H), 6.34 (dd,  $J_1 = 9.0$  Hz,  $J_2 = 2.6$  Hz, 2H), 6.43 (d,  $J = 2.4$  Hz, 2H), 6.63 (d,  $J = 8.8$  Hz, 2H), 7.17-7.23 (m, 3H), 7.34 (d,  $J = 7.6$  Hz, 1H), 7.42 (t,  $J = 7.0$  Hz, 1H), 7.48 (td,  $J_1 = 7.4$  Hz,  $J_2 = 1.0$  Hz, 1H), 7.58 (td,  $J_1 = 7.6$  Hz,  $J_2 = 1.6$  Hz, 1H), 7.65 (td,  $J_1 = 7.6$  Hz,  $J_2 = 1.6$  Hz, 1H), 7.74 (d,  $J = 7.6$  Hz, 1H), 7.78 (d,  $J = 7.2$  Hz, 1H), 8.44 (d,  $J = 4.4$ , 1H), 8.62 (d,  $J = 4.4$ , 1H).  $^{13}\text{C}$  NMR ( $\text{CDCl}_3$ , 400 MHz):  $\delta$  12.66, 44.40, 67.74, 98.00, 106.99, 107.78,



Supplementary Material (ESI) for Organic and Biomolecular Chemistry

This journal is (c) The Royal Society of Chemistry 2011

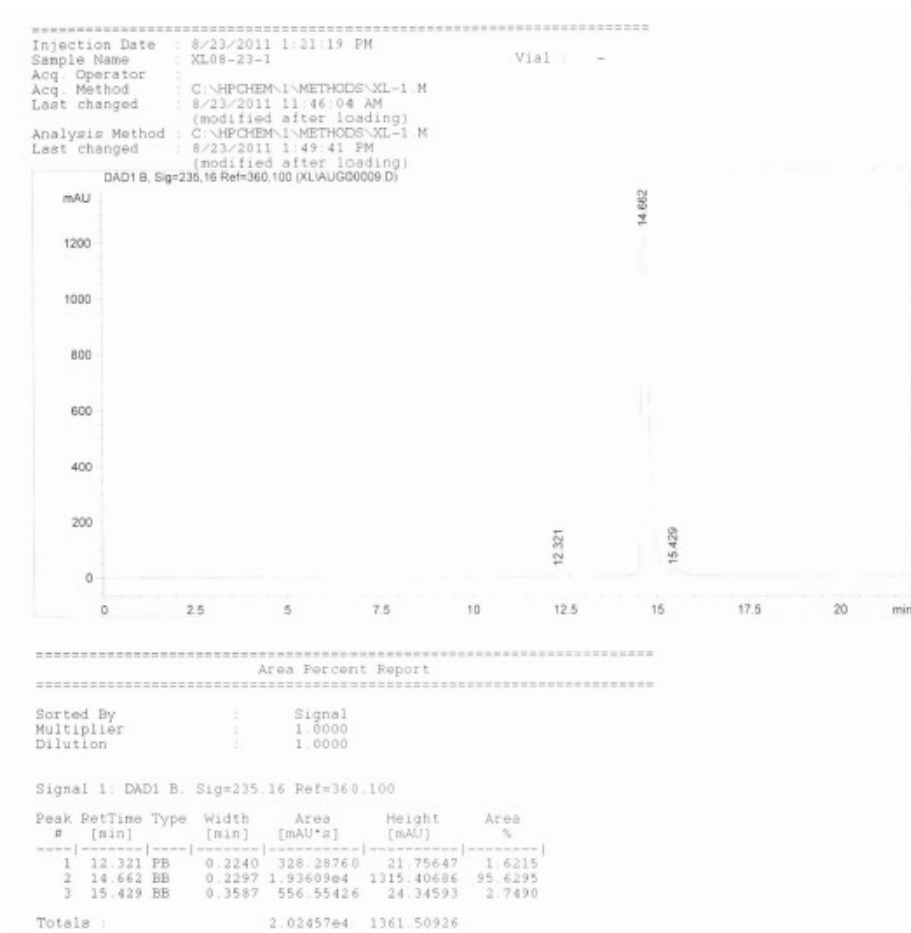

**Fig. S1 (c) HPLC trace of RP**

Supplementary Material (ESI) for Organic and Biomolecular Chemistry

This journal is (c) The Royal Society of Chemistry 2011

#### 4. The pH-titration of free RP and [RP@Zn<sup>2+</sup>]

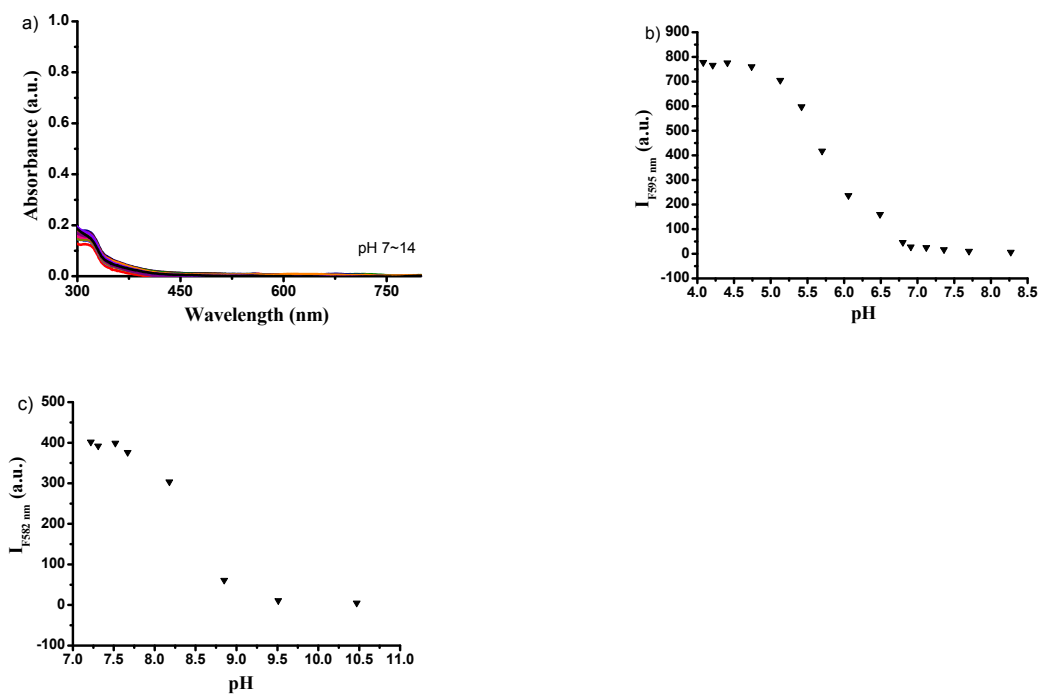

**Fig. S2** The influence of pH on the UV-vis absorption and fluorescence of RP (10  $\mu\text{M}$ ) without  $\text{Zn}^{2+}$  (a and b) and with 10  $\mu\text{M}$   $\text{Zn}^{2+}$  (c) in MeCN/water solution (5:5, v/v), the pH of the solution was adjusted by adding 10%  $\text{HClO}_4$  or 2 M NaOH. Excitation was performed at 562 nm.

Supplementary Material (ESI) for Organic and Biomolecular Chemistry

This journal is (c) The Royal Society of Chemistry 2011

## 5. The selective and competitive experiments

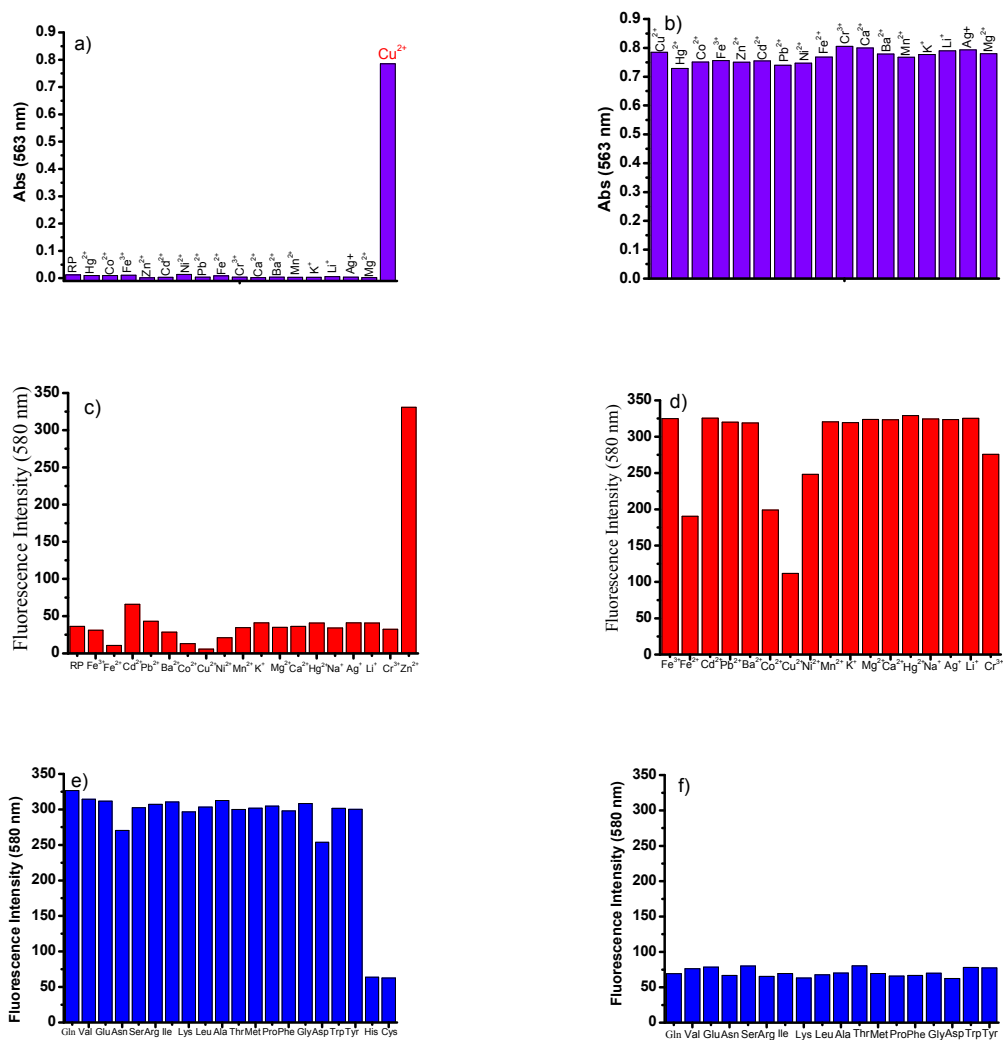

**Fig. S3** Left figures were the selective experiments and right figures were the competitive experiments. Figures (a, b) all metal ions were 20  $\mu$ M; figures (c, d) all metal ions were 10  $\mu$ M; figure (e) all amino acids were 100  $\mu$ M; figure (f) the competitive experiments of His (all amino acids were 100  $\mu$ M). Excitation was performed at 530 nm.

Supplementary Material (ESI) for Organic and Biomolecular Chemistry

This journal is (c) The Royal Society of Chemistry 2011

## 6. Job's plot of RP and $\text{Cu}^{2+}$ , $\text{Zn}^{2+}$

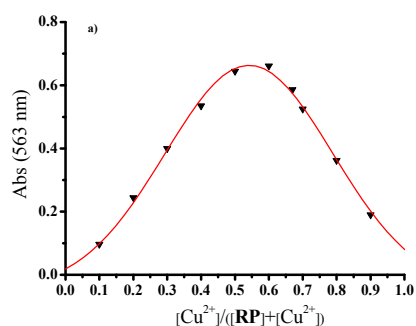

Fig. S4 (a) Job's plot of RP and  $\text{Cu}^{2+}$  ( $[\text{RP}] + [\text{Cu}^{2+}] = 20 \mu\text{M}$ ) in DMSO- $\text{H}_2\text{O}$  (19:1, v/v).

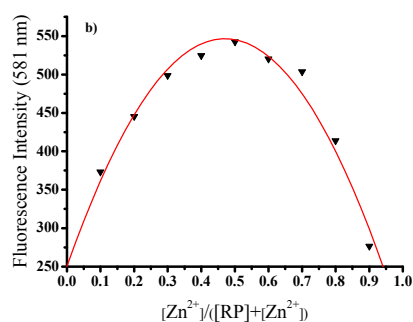

Fig. S4 (b) Job's plot of RP and  $\text{Zn}^{2+}$  ( $[\text{RP}] + [\text{Zn}^{2+}] = 20 \mu\text{M}$ ) in  $\text{CH}_3\text{CH}_2\text{OH}-\text{H}_2\text{O}$  (40:60, v/v, 10 mM Tris- $\text{HClO}_4$ , pH 7.40). Excitation was performed at 562 nm.

## 7. ESI-MS of RP in the presence of $\text{Cu}^{2+}$ or $\text{Zn}^{2+}$

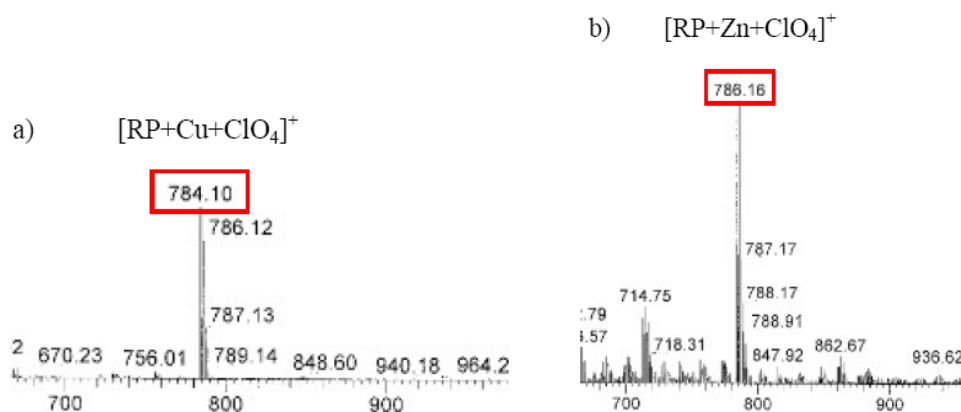

Fig. S5 (a) ESI-MS of RP in the presence of  $\text{Cu}^{2+}$  in DMSO.  
(b) ESI-MS of RP in the presence of  $\text{Zn}^{2+}$  in  $\text{CH}_3\text{CH}_2\text{OH}$ .

Supplementary Material (ESI) for Organic and Biomolecular Chemistry  
This journal is (c) The Royal Society of Chemistry 2011

### 8. Partial $^1\text{H}$ NMR spectra of RP and $\text{Zn}^{2+}$

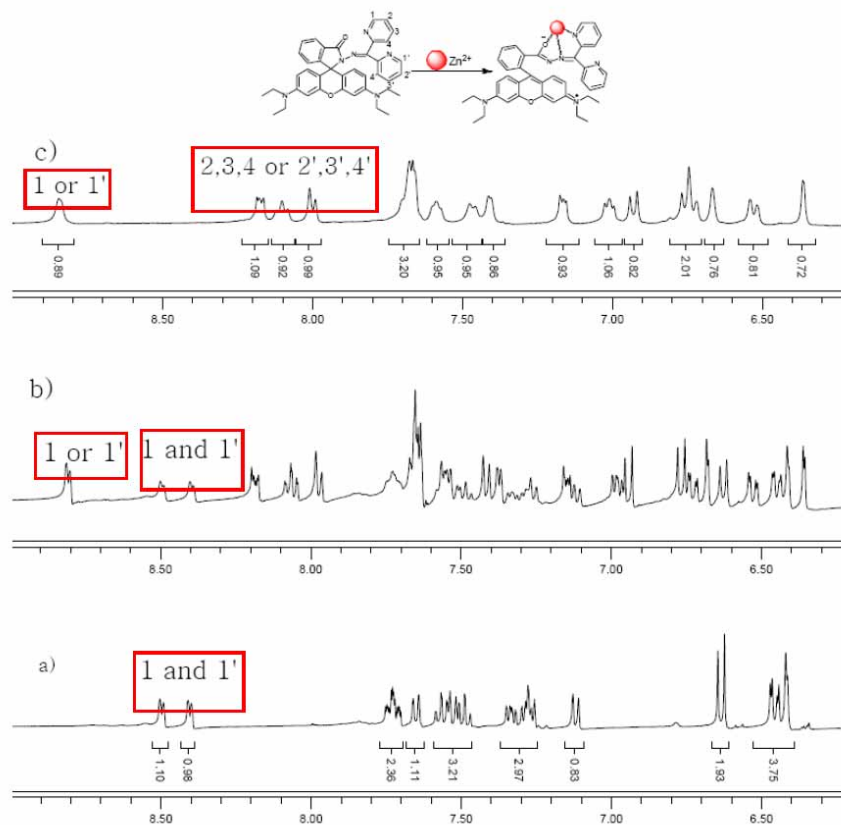

**Fig. S6**  $^1\text{H}$ -NMR spectra of (a) free sensor **RP**, (b) sensor **RP** +  $\text{Zn}^{2+}$  (0.3 eq), and (c) sensor **RP** +  $\text{Zn}^{2+}$  (0.5 eq) in  $\text{CD}_3\text{CN}$ . Inset: proposed binding mode of sensor **RP** with  $\text{Zn}^{2+}$ .



Supplementary Material (ESI) for Organic and Biomolecular Chemistry  
This journal is (c) The Royal Society of Chemistry 2011

### 9. Partial $^1\text{H}$ NMR spectra of RP and $\text{Cu}^{2+}$

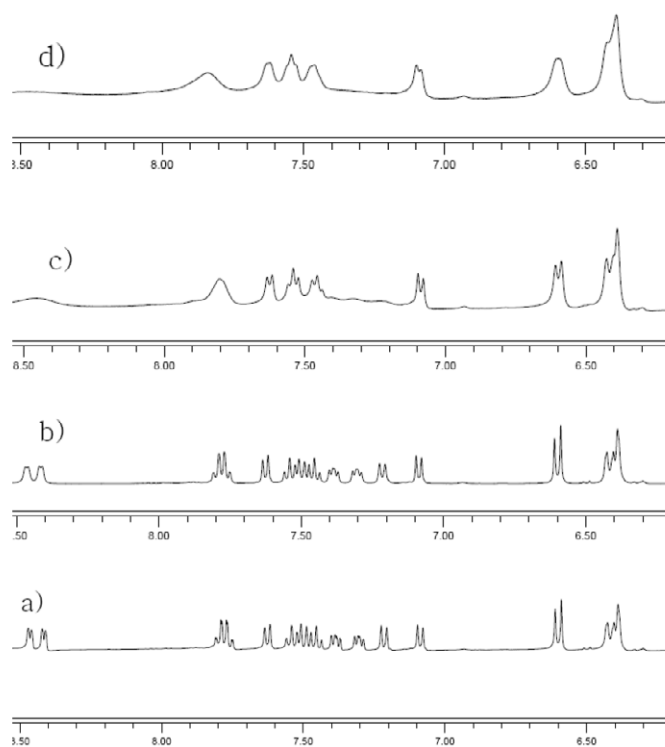

**Fig. S7**  $^1\text{H}$ -NMR spectra of (a) free sensor **RP**, (b) sensor **RP** +  $\text{Cu}^{2+}$  (0.01 eq), (c) sensor **RP** +  $\text{Cu}^{2+}$  (0.03 eq) and (d) sensor **RP** +  $\text{Cu}^{2+}$  (0.09 eq) in  $\text{DMSO-}d_6$ .

### 10. Reference

[1] Xiang, Y.; Tong, A.; Jin, P.; Ju, Y. *Org. Lett.*, 2006, **8**, 2863-2866.
